# Supplementary material
Source: Research Square preprint supplement (doi:10.21203/rs.3.rs-10303868/v1)
Supplement: Supplementary file 1 [file 9fa33508a8291c3c78f34d25.xlsx]

## Sheet: Dataset
NDVI	Slope	Distance_from_Mine	Drainage_Density	Distance_from_Road	Settlement_Density	LULC_Index	SRI
0.399632	2.06859	9.80946	0.396391	1.12093	352.099	0.252042	0.701128
0.860571	22.638	1.72003	2.21915	9.03527	272.687	0.350731	1.73915
0.685595	11.6881	2.84362	2.25441	5.102	161.669	0.259309	0.941721
0.578927	18.2914	13.529	2.62223	8.28193	408.76	0.179832	1.5858
0.224815	31.8573	9.29322	2.95915	3.26849	345.518	0.208572	2.98844
0.224796	9.47594	0.633357	3.90824	8.96568	89.6823	0.514701	1.45175
0.146467	14.953	1.97134	2.16194	3.9531	456.354	0.2857	2.51069
0.792941	26.6887	10.1208	1.42723	0.207293	413.043	0.427843	1.87768
0.580892	8.77914	0.573393	3.22171	9.06328	475.402	0.553076	2.03703
0.666458	3.61732	2.83172	1.22916	1.00374	365.603	0.721355	1.53511
0.116468	10.8515	8.45664	1.86809	3.26121	310.573	0.135381	1.09166
0.875928	6.48152	10.5325	0.498134	9.50561	214.939	0.819469	0.290254
0.765954	32.6097	9.95344	0.296333	9.51101	467.037	0.66511	2.38888
0.269871	28.4761	3.7519	3.85806	5.77704	434.371	0.173583	2.95609
0.24546	22.5357	10.8266	3.37672	6.35519	32.1571	0.886221	1.97806
0.246724	30.6297	3.94011	2.8447	4.53961	22.9198	0.928785	2.34837
0.343394	28.3249	5.2183	1.75402	3.00279	194.467	0.15497	2.15627
0.519805	7.34338	11.3241	0.858518	3.35378	407.171	0.34919	1.09619
0.445556	31.347	9.91968	0.794461	6.75793	493.765	0.825581	2.94865
0.332983	19.3376	12.8137	1.15092	7.54851	83.7043	0.773434	1.36542
0.589482	28.453	10.0354	2.28706	7.93663	301.124	0.266069	2.11052
0.211595	31.4671	8.74047	2.91546	7.91722	196.637	0.288414	2.3471
0.333716	11.8121	1.85828	2.70875	1.00294	485.258	0.433425	2.2005
0.393089	4.74177	5.83188	1.26375	4.99476	422.638	0.536071	1.31052
0.464856	8.7498	4.34543	3.82849	0.669832	420.781	0.656429	2.17914
0.728141	15.5217	4.03785	3.00401	5.54034	239.66	0.432022	1.48016
0.259739	28.8125	14.6087	2.30655	4.47115	213.262	0.516281	2.24212
0.511388	30.2648	6.19992	2.52454	8.88827	143.969	0.772724	2.63116
0.573932	1.23637	13.4347	1.79448	3.57406	37.624	0.133015	0.200003
0.13716	18.3654	9.65151	1.14138	1.25896	433.714	0.327193	2.09812
0.586036	15.192	12.0248	1.5527	1.51562	408.321	0.742015	1.98631
0.236419	8.55167	7.78824	3.07982	7.63896	499.862	0.905686	2.09438
0.152041	5.07542	8.86511	0.254695	6.22036	498.352	0.56051	1.09327
0.859108	12.4789	7.64151	0.641076	1.10111	282.162	0.578902	0.87582
0.872506	33.0589	3.33102	0.37481	0.932657	386.804	0.196455	1.87061
0.746718	11.9889	10.9756	0.354769	7.03959	472.935	0.502671	1.16186
0.343691	18.6389	4.5712	3.45075	0.820354	426.327	0.579356	2.60914
0.178138	24.9026	0.852582	2.8739	8.23641	131.201	0.318223	2.56838
0.647386	13.3634	9.85935	2.00186	7.0918	230.767	0.342319	1.17677
0.452122	34.0406	3.0681	0.57177	0.905353	73.2881	0.439556	2.09453
0.197631	33.7232	14.1366	2.06814	0.939893	477.485	0.118064	3.06346
0.496142	9.5606	14.332	1.99919	9.86773	307.026	0.389871	0.581455
0.127511	17.9064	13.7655	0.858167	3.80528	122.035	0.290303	1.34028
0.827456	11.2299	5.8673	1.84864	3.76936	339.133	0.394748	1.41576
0.307024	10.6846	0.724121	1.71432	8.14672	312.883	0.207786	1.27426
0.630018	2.25416	13.9606	2.54023	9.47776	185.5	0.901475	0.841694
0.349369	21.7252	6.70867	2.61336	9.86141	65.6432	0.634233	1.75296
0.516054	18.0911	14.5165	0.372155	7.55844	339.071	0.711192	1.34043
0.537368	2.75028	14.4725	1.62353	3.82497	264.951	0.810254	0.921034
0.247884	10.474	12.8686	2.57827	0.926657	388.436	0.548598	2.25799
0.875668	31.881	4.76951	2.11192	7.79375	264.88	0.178228	2.04877
0.720106	9.1451	6.08392	3.45466	5.6282	427.569	0.583396	1.74243
0.851599	5.92643	12.8415	2.70304	4.2998	280.434	0.628157	0.769516
0.815862	17.6414	5.09537	0.819151	9.07291	284.86	0.770896	1.22604
0.57832	34.5121	2.95764	0.468161	1.20086	439.56	0.488494	2.96101
0.837499	9.22988	8.57362	2.64119	4.97699	207.707	0.214822	0.66105
0.170794	23.8526	14.0742	0.300743	0.212401	75.6675	0.355398	1.48244
0.256786	26.8951	10.5924	2.42595	4.73974	24.1035	0.426774	1.71403
0.136182	9.07968	8.76589	3.77287	0.657402	380.017	0.681326	2.26321
0.360264	25.7594	1.90906	2.3868	1.2763	313.952	0.6137	2.71509
0.410942	13.5046	9.4176	1.67505	1.26351	354.999	0.420487	1.87564
0.317079	22.4984	14.8558	2.6445	6.52718	114.352	0.987864	1.71356
0.76299	22.54	2.53122	1.94136	7.48584	76.822	0.645197	1.43991
0.385403	19.2163	8.01578	2.27334	5.87535	17.1269	0.313504	1.09942
0.324748	4.06985	13.2219	3.77757	9.62551	181.788	0.191604	0.772521
0.534157	29.4003	11.2411	1.66719	3.81122	299.06	0.237573	2.14792
0.212739	11.9065	10.6067	3.85252	2.92855	202.2	0.321362	1.81058
0.741758	7.34163	10.686	3.64033	8.69913	224.363	0.244613	0.6873
0.159641	2.38635	5.71262	0.944006	2.3136	453.038	0.26791	1.60272
0.88951	21.0904	4.75708	0.463573	9.6359	180.645	0.356586	1.35207
0.717796	24.0372	12.2357	0.582956	0.220329	261.855	0.256036	1.5524
0.258973	1.56399	12.2466	0.269243	9.7018	393.99	0.907089	1.37615
0.104418	18.4112	13.0725	0.558883	0.527283	204.306	0.17221	1.34087
0.752369	8.70086	13.742	2.79543	8.92232	314.822	0.57206	0.771294
0.665486	22.9359	7.91446	0.470517	5.32424	432.558	0.469357	1.53818
0.683206	6.92846	7.77199	1.41211	9.93035	475.265	0.984141	1.7233
0.717016	24.4919	12.0753	3.41053	0.830586	82.066	0.200835	1.65903
0.159236	14.149	9.92448	0.288433	5.58316	464.028	0.45807	1.8141
0.386773	32.8488	10.6785	3.29498	9.6961	251.137	0.972523	2.76027
0.192695	5.67571	12.039	1.27105	5.27867	136.54	0.878956	0.753108
0.790483	12.5963	13.4051	0.649026	6.33105	234.977	0.835365	1.35926
0.598639	4.8581	5.40093	2.8476	6.98791	490.216	0.332113	1.52847
0.364718	32.4396	5.94595	2.58998	4.59996	251.383	0.253799	2.57449
0.150847	30.8295	1.86274	3.53439	6.31282	171.088	0.701779	3.03686
0.348786	9.77002	8.88506	2.99327	5.88471	320.366	0.936438	1.88573
0.360147	23.4395	1.02116	3.25323	9.02146	127.671	0.601087	2.20133
0.683685	28.7856	7.25117	1.27173	0.549919	47.173	0.614451	1.53659
0.610046	19.8768	8.36835	0.87427	2.88154	73.1511	0.351981	1.20965
0.80977	19.0081	4.65485	3.05234	9.50907	72.7425	0.792544	1.76952
0.477772	9.22298	9.06708	3.26597	8.91361	84.4323	0.268339	1.16383
0.195675	4.16549	0.942254	3.96392	4.611	78.0253	0.391311	1.65705
0.670596	31.5053	1.04155	1.76795	6.23931	324.029	0.482893	2.38692
0.708628	31.6142	12.4277	1.61367	2.84607	99.1212	0.556849	1.54917
0.549022	22.5254	5.72276	3.15037	1.9624	179.377	0.318169	1.90954
0.716774	12.527	2.34238	1.49505	4.69061	449.426	0.203353	1.60444
0.495036	12.8731	8.07253	3.73688	3.59819	242.241	0.649558	1.95716
0.518186	25.6825	11.6649	3.46197	5.8782	337.103	0.359767	1.90098
0.442033	31.5017	3.6294	1.83018	0.869573	94.4367	0.623114	2.61374
0.120335	31.1609	9.53191	3.05331	9.74651	104.222	0.238926	2.2113
0.186313	27.5158	1.73754	3.06726	9.86349	30.0256	0.533026	2.12532

## Sheet: Descriptive_Stats
index	NDVI	Slope	Distance_from_Mine	Drainage_Density	Distance_from_Road	Settlement_Density	LULC_Index	SRI
count	100	100	100	100	100	100	100	100
mean	0.476145	17.9263	8.00522	2.06637	5.20885	267.397	0.488428	1.72663
std	0.237992	9.96578	4.25468	1.11512	3.15415	145.59	0.24061	0.648085
min	0.104418	1.23637	0.573393	0.254695	0.207293	17.1269	0.118064	0.200003
25%	0.254561	9.22815	4.51476	1.14854	2.71295	135.205	0.28136	1.33284
50%	0.471314	18.1912	8.65705	2.13693	5.30145	268.819	0.448813	1.71867
75%	0.684162	27.0502	11.4093	2.99595	7.98915	407.459	0.651276	2.16199
max	0.88951	34.5121	14.8558	3.96392	9.93035	499.862	0.987864	3.06346

## Sheet: Correlation
index	NDVI	Slope	Distance_from_Mine	Drainage_Density	Distance_from_Road	Settlement_Density	LULC_Index	SRI
NDVI	1	-0.0340325	-0.0376541	-0.211882	0.120075	0.0693215	0.0479664	-0.351109
Slope	-0.0340325	1	-0.146354	-0.0117826	-0.0823933	-0.228878	-0.11566	0.691047
Distance_from_Mine	-0.0376541	-0.146354	1	-0.214816	-0.0346945	-0.0219568	0.0816897	-0.361448
Drainage_Density	-0.211882	-0.0117826	-0.214816	1	0.18753	-0.218485	-0.016005	0.268432
Distance_from_Road	0.120075	-0.0823933	-0.0346945	0.18753	1	-0.133339	0.249953	-0.16404
Settlement_Density	0.0693215	-0.228878	-0.0219568	-0.218485	-0.133339	1	-0.0262991	0.19734
LULC_Index	0.0479664	-0.11566	0.0816897	-0.016005	0.249953	-0.0262991	1	0.0609066
SRI	-0.351109	0.691047	-0.361448	0.268432	-0.16404	0.19734	0.0609066	1

## Sheet: Regression
Variable	Coefficient	p_value
const	0.421607	0.000806369
NDVI	-0.809533	5.99585e-15
Slope	0.0501579	3.29345e-41
Distance_from_Mine	-0.0319977	3.25635e-09
Drainage_Density	0.170533	1.25755e-13
Distance_from_Road	-0.0257435	0.000250179
Settlement_Density	0.00197331	1.2024e-23
LULC_Index	0.617367	1.66603e-10

## Sheet: VIF
Variable	VIF
NDVI	1.08789
Slope	1.11677
Distance_from_Mine	1.10129
Drainage_Density	1.2186
Distance_from_Road	1.15727
Settlement_Density	1.14529
LULC_Index	1.08744

## Sheet: PCA
PC	Explained_Variance
PC1	0.211799
PC2	0.195699
PC3	0.156855
PC4	0.151985
PC5	0.115363
PC6	0.0914483
PC7	0.0768504

## Sheet: ANOVA
Metric	Value
R_squared	0.914061
Adj_R_squared	0.907522
F_statistic	139.79
Prob(F)	3.57342e-46

## Sheet: ROC
FPR	TPR
0	0
0	0.02
0	0.76
0.02	0.76
0.02	0.78
0.04	0.78
0.04	0.82
0.06	0.82
0.06	0.86
0.1	0.86
0.1	0.96
0.26	0.96
0.26	0.98
0.3	0.98
0.3	1
1	1

## Sheet: ROC_Summary
ROC_AUC
0.9744
