# Supplementary material
Source: Research Square preprint supplement (doi:10.21203/rs.3.rs-10303868/v1)
Supplement: Supplementary file 2 [file f3428126e53b538aef50dd0c.xlsx]

## Sheet: Input_Data_Framework
Sl. No.	Input Variable	Category	Typical Data Source	Unit/Format	Purpose in Risk Assessment
1	Geological characteristics	Geological	Geological Survey/Field	Vector	Rock stability
2	Digital Elevation Model (DEM)	Topographic	SRTM/ASTER/LiDAR	Raster	Terrain analysis
3	Slope and aspect	Topographic	Derived from DEM	Degrees	Slope stability
4	Lithology	Geological	Geological Map	Vector	Rock properties
5	Land Use/Land Cover (LULC)	Environmental	Sentinel-2/Landsat	Raster	Surface condition
6	Drainage density	Hydrological	GIS analysis	km/km²	Runoff/erosion
7	Distance from faults	Geological	Fault map	Meters	Structural risk
8	Distance from blasting zones	Operational	Mine plan	Meters	Blast impact
9	Waste dump locations	Operational	Mine survey	Vector	Dump stability
10	Road network	Infrastructure	Mine GIS	Vector	Accessibility
11	Rainfall	Climatic	Meteorological Dept.	mm/year	Weather influence
12	Groundwater depth	Hydrological	Boreholes	m	Water hazard
13	Vegetation Index (NDVI)	Environmental	Sentinel-2/Landsat	Index	Vegetation health
14	Air quality indicators	Environmental	Monitoring stations	µg/m³	Pollution
15	Water quality indicators	Environmental	Water sampling	mg/L	Water pollution
16	Field survey observations	Field	GPS/Inspection	Text	Validation
